# Supplementary material
Source: PubMed Central journal article supplement (PMC10328108)
Supplement: NIHMS509468-supplement-dummy_label.pdf [file NIHMS509468-supplement-dummy_label.pdf]

## Electronic supplementary material

**ESM Table 1** Collective clinical diagnoses of individuals from whom tissue samples were collected and analysed for this study

| <b>Diagnosis</b>                   | <b>Colon</b> | <b>Liver</b> | <b>Pancreas</b> |
|------------------------------------|--------------|--------------|-----------------|
| Adenocarcinoma                     | 102          | 31           | 26              |
| Transitional cell carcinoma        | 1            | 1            | 0               |
| Cancer                             | 8            | 1            | 0               |
| Adenomyosis                        | 1            | 0            | 0               |
| Anaemia                            | 9            | 2            | 0               |
| Angina                             | 1            | 0            | 0               |
| Anxiety disorder                   | 1            | 1            | 0               |
| Aortic insufficiency               | 1            | 0            | 0               |
| Arthritis                          | 3            | 1            | 0               |
| Asthma                             | 3            | 0            | 0               |
| Atherosclerotic vascular disease   | 2            | 1            | 0               |
| Atrial fibrillation                | 4            | 1            | 0               |
| Basal cell carcinoma               | 3            | 1            | 0               |
| Benign prostatic hypertrophy       | 1            | 0            | 0               |
| Bundle branch block                | 1            | 0            | 0               |
| Burkett's lymphoma                 | 3            | 1            | 0               |
| Carcinoma                          | 22           | 15           | 24              |
| Cataracts                          | 3            | 0            | 0               |
| Chronic inflammatory bowel disease | 4            | 0            | 0               |
| Cold agglutinin disease            | 1            | 0            | 0               |
| Colonic inertia                    | 1            | 0            | 0               |
| Congestive heart failure           | 4            | 0            | 0               |
| Constipation                       | 4            | 0            | 0               |
| Coronary artery disease            | 6            | 3            | 0               |
| Crohn's disease                    | 11           | 1            | 0               |
| Degenerative joint disease         | 3            | 1            | 1               |
| Depression                         | 3            | 2            | 0               |
| Deep vein thrombosis               | 2            | 1            | 0               |
| Diabetes, type 1                   | 2            | 0            | 1               |
| Diabetes, type 2                   | 7            | 0            | 0               |
| Diabetic retinopathy               | 1            | 0            | 0               |
| Diabetic neuropathy                | 3            | 0            | 0               |
| Diarrhoea                          | 1            | 0            | 0               |
| Distal neurotisation of appendix   | 1            | 0            | 0               |
| Diverticulosis                     | 42           | 1            | 1               |
| Endometriosis                      | 2            | 0            | 0               |
| Eosinophilia                       | 1            | 0            | 0               |
| Eosinophilic dermatitis            | 1            | 0            | 0               |
| Epistaxis                          | 1            | 0            | 0               |
| Familial adenomatous polyposis     | 2            | 0            | 0               |
| Gastro-oesophageal reflux          | 4            | 1            | 0               |
| Grave's disease                    | 1            | 0            | 0               |
| Gout                               | 1            | 0            | 0               |
| Systolic murmur                    | 1            | 0            | 0               |
| Hearing loss                       | 1            | 0            | 0               |

| <b>Diagnosis</b>                   | <b>Colon</b> | <b>Liver</b> | <b>Pancreas</b> |
|------------------------------------|--------------|--------------|-----------------|
| Haemangiomas of liver              | 2            | 2            | 0               |
| Haemorrhoids                       | 1            | 0            | 0               |
| Hepatitis                          | 1            | 0            | 0               |
| HIV                                | 1            | 0            | 0               |
| Hypercholesterolaemia              | 3            | 1            | 0               |
| Hyperlipidaemia                    | 3            | 0            | 1               |
| Hypertension                       | 25           | 3            | 1               |
| Iliac artery aneurism              | 1            | 0            | 0               |
| Kidney stones                      | 4            | 1            | 0               |
| Lyme's disease                     | 1            | 0            | 0               |
| Malrotation of colon               | 2            | 0            | 0               |
| Non-Hodgkin's lymphoma             | 1            | 0            | 0               |
| Melanosis coli                     | 3            | 0            | 0               |
| Migraine headaches                 | 5            | 0            | 0               |
| Mitral valve regurgitation         | 2            | 0            | 0               |
| Myocardial infarction              | 3            | 0            | 0               |
| Nocturnal incontinence             | 1            | 0            | 0               |
| Obesity                            | 6            | 0            | 0               |
| Opiates                            | 1            | 0            | 0               |
| Osteoarthritis                     | 5            | 1            | 0               |
| Osteoporosis                       | 3            | 0            | 0               |
| Pancreatitis                       | 1            | 0            | 26              |
| Peptic ulcer disease               | 2            | 0            | 1               |
| Peripheral vascular disease        | 1            | 0            | 0               |
| Peritonitis                        | 1            | 0            | 0               |
| Polycystic kidney disease          | 1            | 0            | 0               |
| Polio                              | 1            | 0            | 0               |
| Radiation proctitis                | 3            | 0            | 0               |
| Rheumatic fever                    | 1            | 1            | 0               |
| Rheumatoid arthritis               | 0            | 2            | 0               |
| Roseacea                           | 1            | 0            | 0               |
| Seizure disorder                   | 1            | 0            | 0               |
| Serrositis                         | 5            | 1            | 0               |
| Shingles                           | 1            | 0            | 0               |
| Short bowel syndrome               | 1            | 0            | 0               |
| Situational depression             | 1            | 0            | 0               |
| Submucosal lipoma                  | 1            | 0            | 0               |
| Syncope                            | 1            | 0            | 0               |
| Cancer                             | 8            | 1            | 0               |
| Thrombocytopenic purpura           | 1            | 0            | 0               |
| Transient ischaemic attack         | 1            | 0            | 0               |
| Tubular adenoma                    | 3            | 0            | 0               |
| Tubulovillous adenoma              | 30           | 1            | 7               |
| Ulcerative colitis                 | 5            | 0            | 0               |
| Vitamin B <sub>12</sub> deficiency | 2            | 0            | 0               |
| Wegener's granulomatosis           | 1            | 0            | 0               |

Tissue removed was deemed pathologically normal; more than one diagnosis per each individual tissue possible
